# Supplementary material
Source: PubMed Central journal article supplement (PMC3395095)
Supplement: emboj2012141s1.pdf [file emboj2012141s1.pdf]

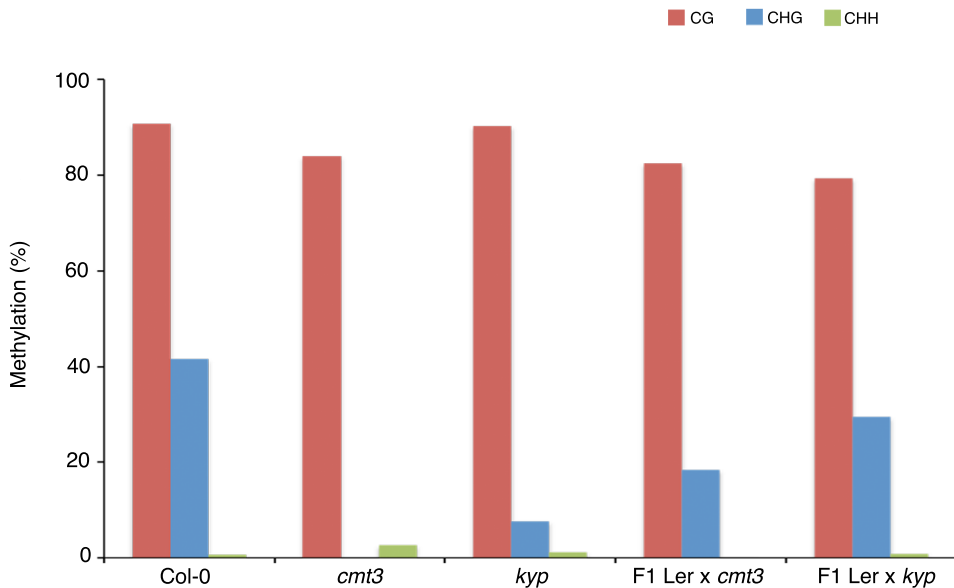

**Supplementary Figure S1.** Bisulfite sequencing analysis of cytosine methylation at the methylated zone of the large *IBM1* intron in wild-type, *cmt3* and *kyp* plants, and of the *cmt3*-derived and the *kyp*-derived alleles in Ler x *cmt3* and Ler x *kyp* F1 hybrids, respectively. Proportions of methylated cytosines at CG (red), CHG (blue) and CHH (green) sites are indicated as percentages.

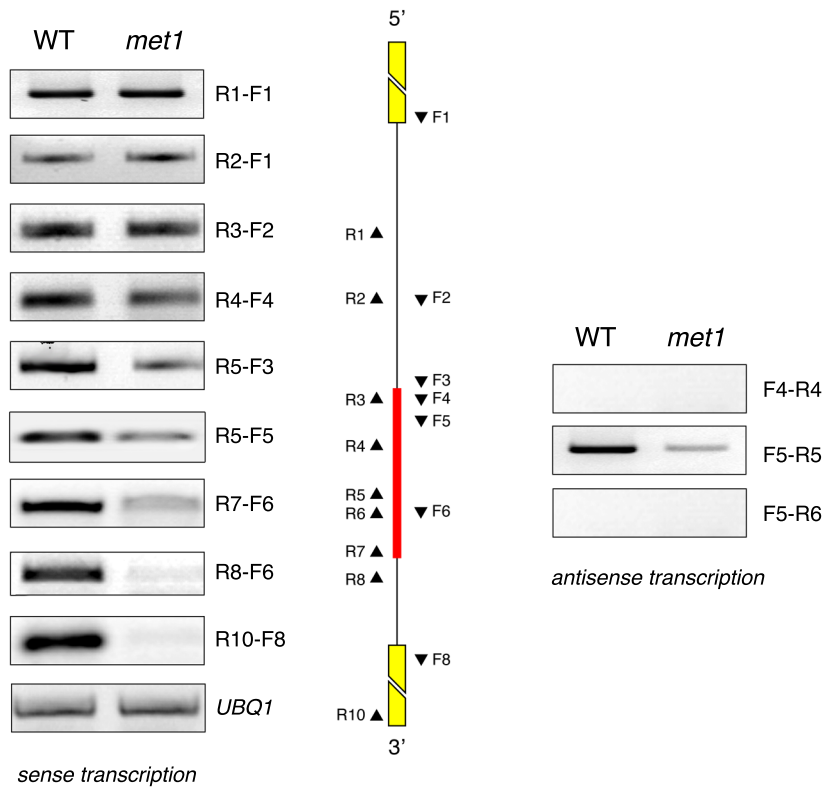

**Supplementary Figure S2.** RT-PCR analysis of sense (left panel) and antisense (right) *IBM1-L* transcription in wild-type and *met1-3* plants, using primer sets designed along the length of the large intron of the *IBM1* gene (middle). Primer positions, intron, exons and the methylated intronic region are indicated by black triangles, a black line, yellow boxes and a red bar, respectively. The amplification of *UBQ1* was used to normalize the RNA template levels.

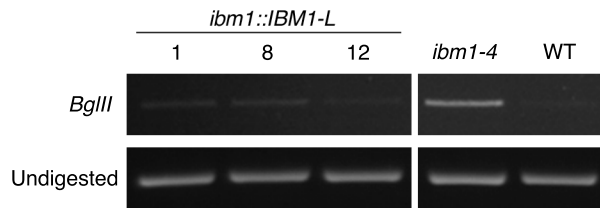

**Supplementary Figure S3.** CHG methylation at the *BNS* locus in 3 independent *ibm1::IBM1-L* lines and in *ibm1* and wild-type plants. DNA methylation was analyzed by restriction digestion with the methylation-sensitive enzyme *BglIII* followed by PCR with BNS-F2/R3 primers (Supplementary Table 1).

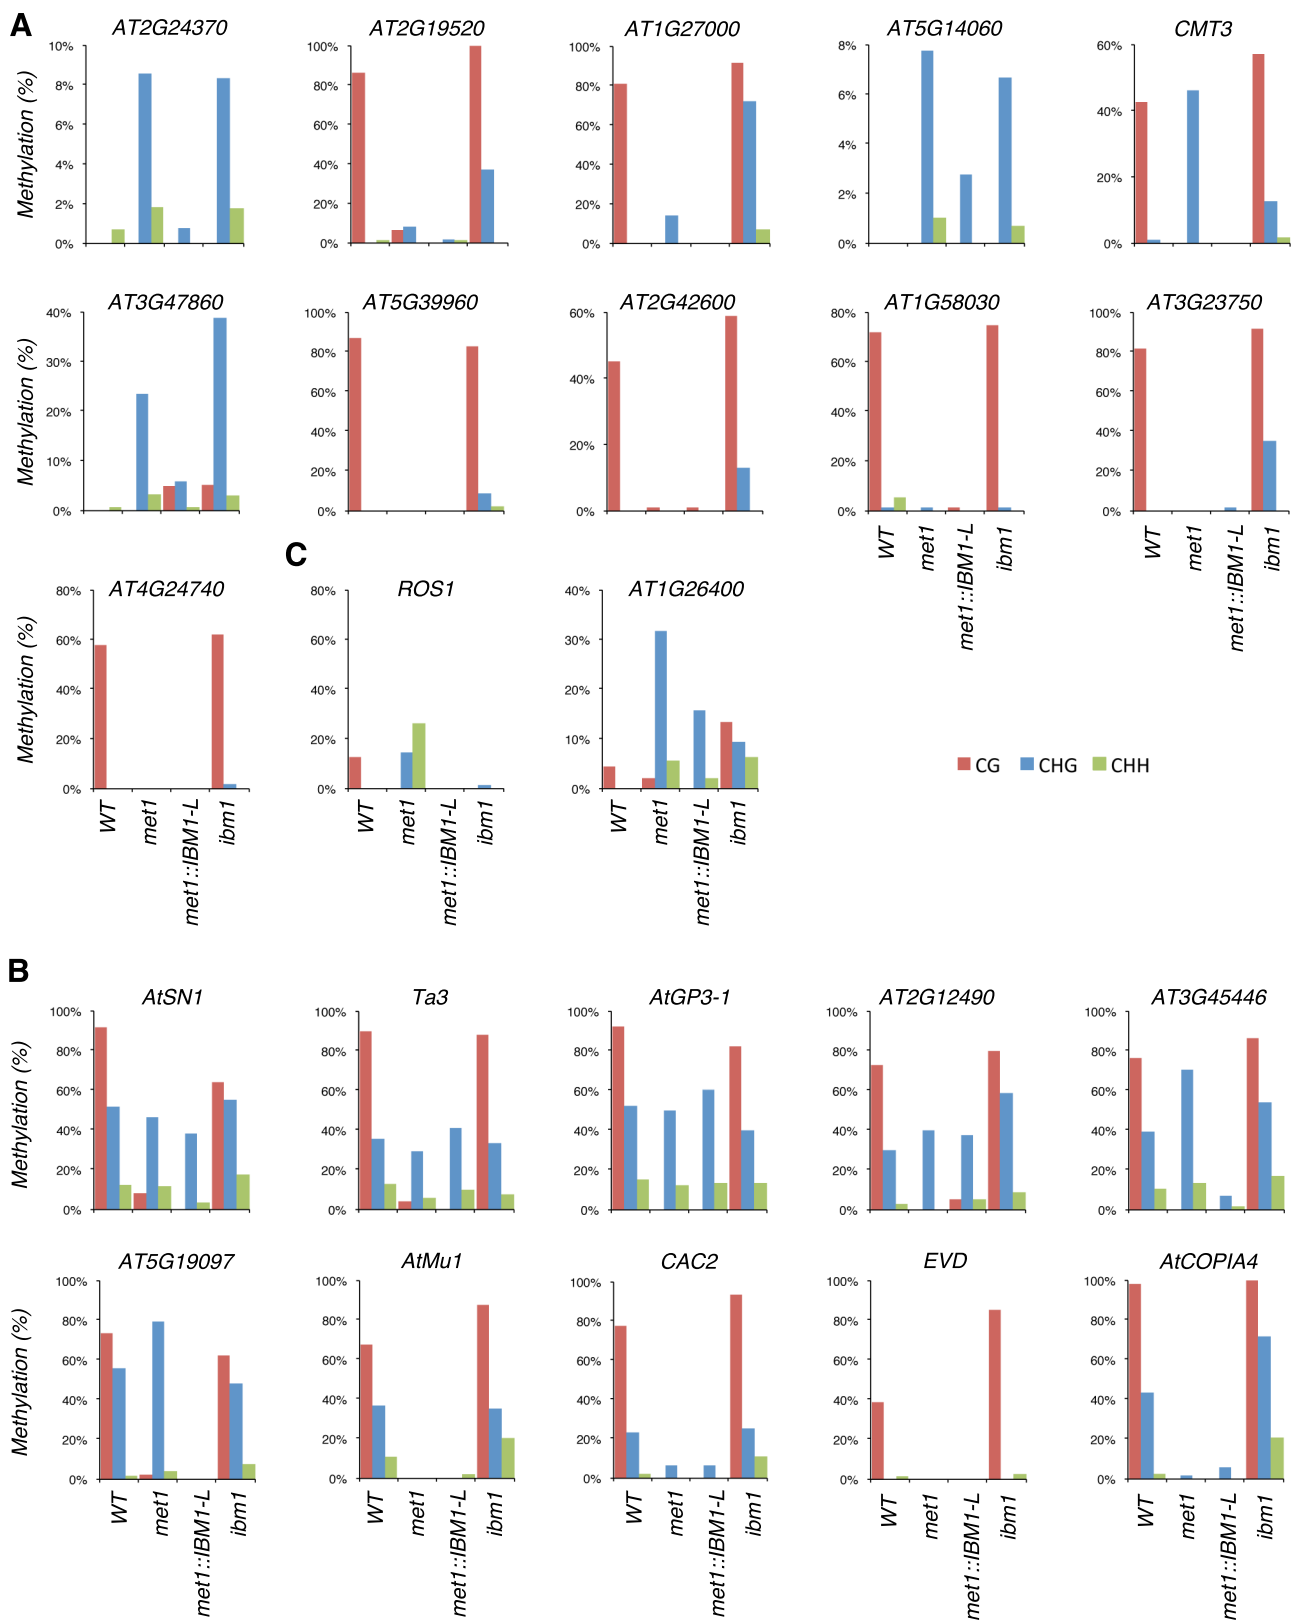

**Supplementary Figure S4.** Bisulfite sequencing analysis of the DNA methylation patterns at eleven genes (A), ten transposable elements (B) and at the *ROS1* gene and the *AT1G26400* *ROS1* target locus (C), in wild-type, *met1*, *met1::IBM1-L* and *ibm1* plants. Proportions of methylated cytosines at CG (red), CHG (blue) and CHH (green) sites are indicated as percentages.

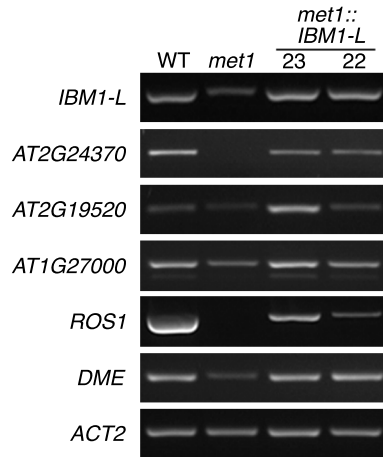

**Supplementary Figure S5.** Transcription analysis in 2 independent *met1::IBM1-L* lines. Representative images of RT-PCR analyses at *IBM1-L*, *AT2G24370*, *AT2G19520* and *AT1G27000*, *ROS1* and *DME* genes.

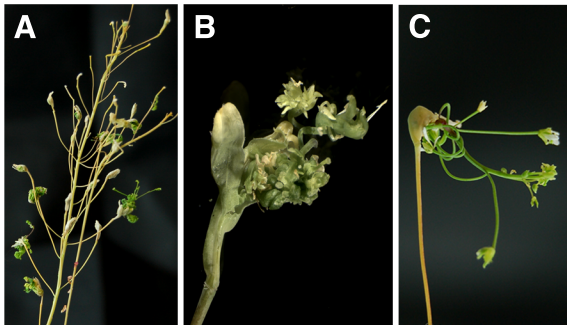

**Supplementary Figure S6.** Abnormal flower phenotypes observed in some *met1-3* lines. Images of a whole inflorescence shoot (A) and magnification of two abnormal siliques (B & C).

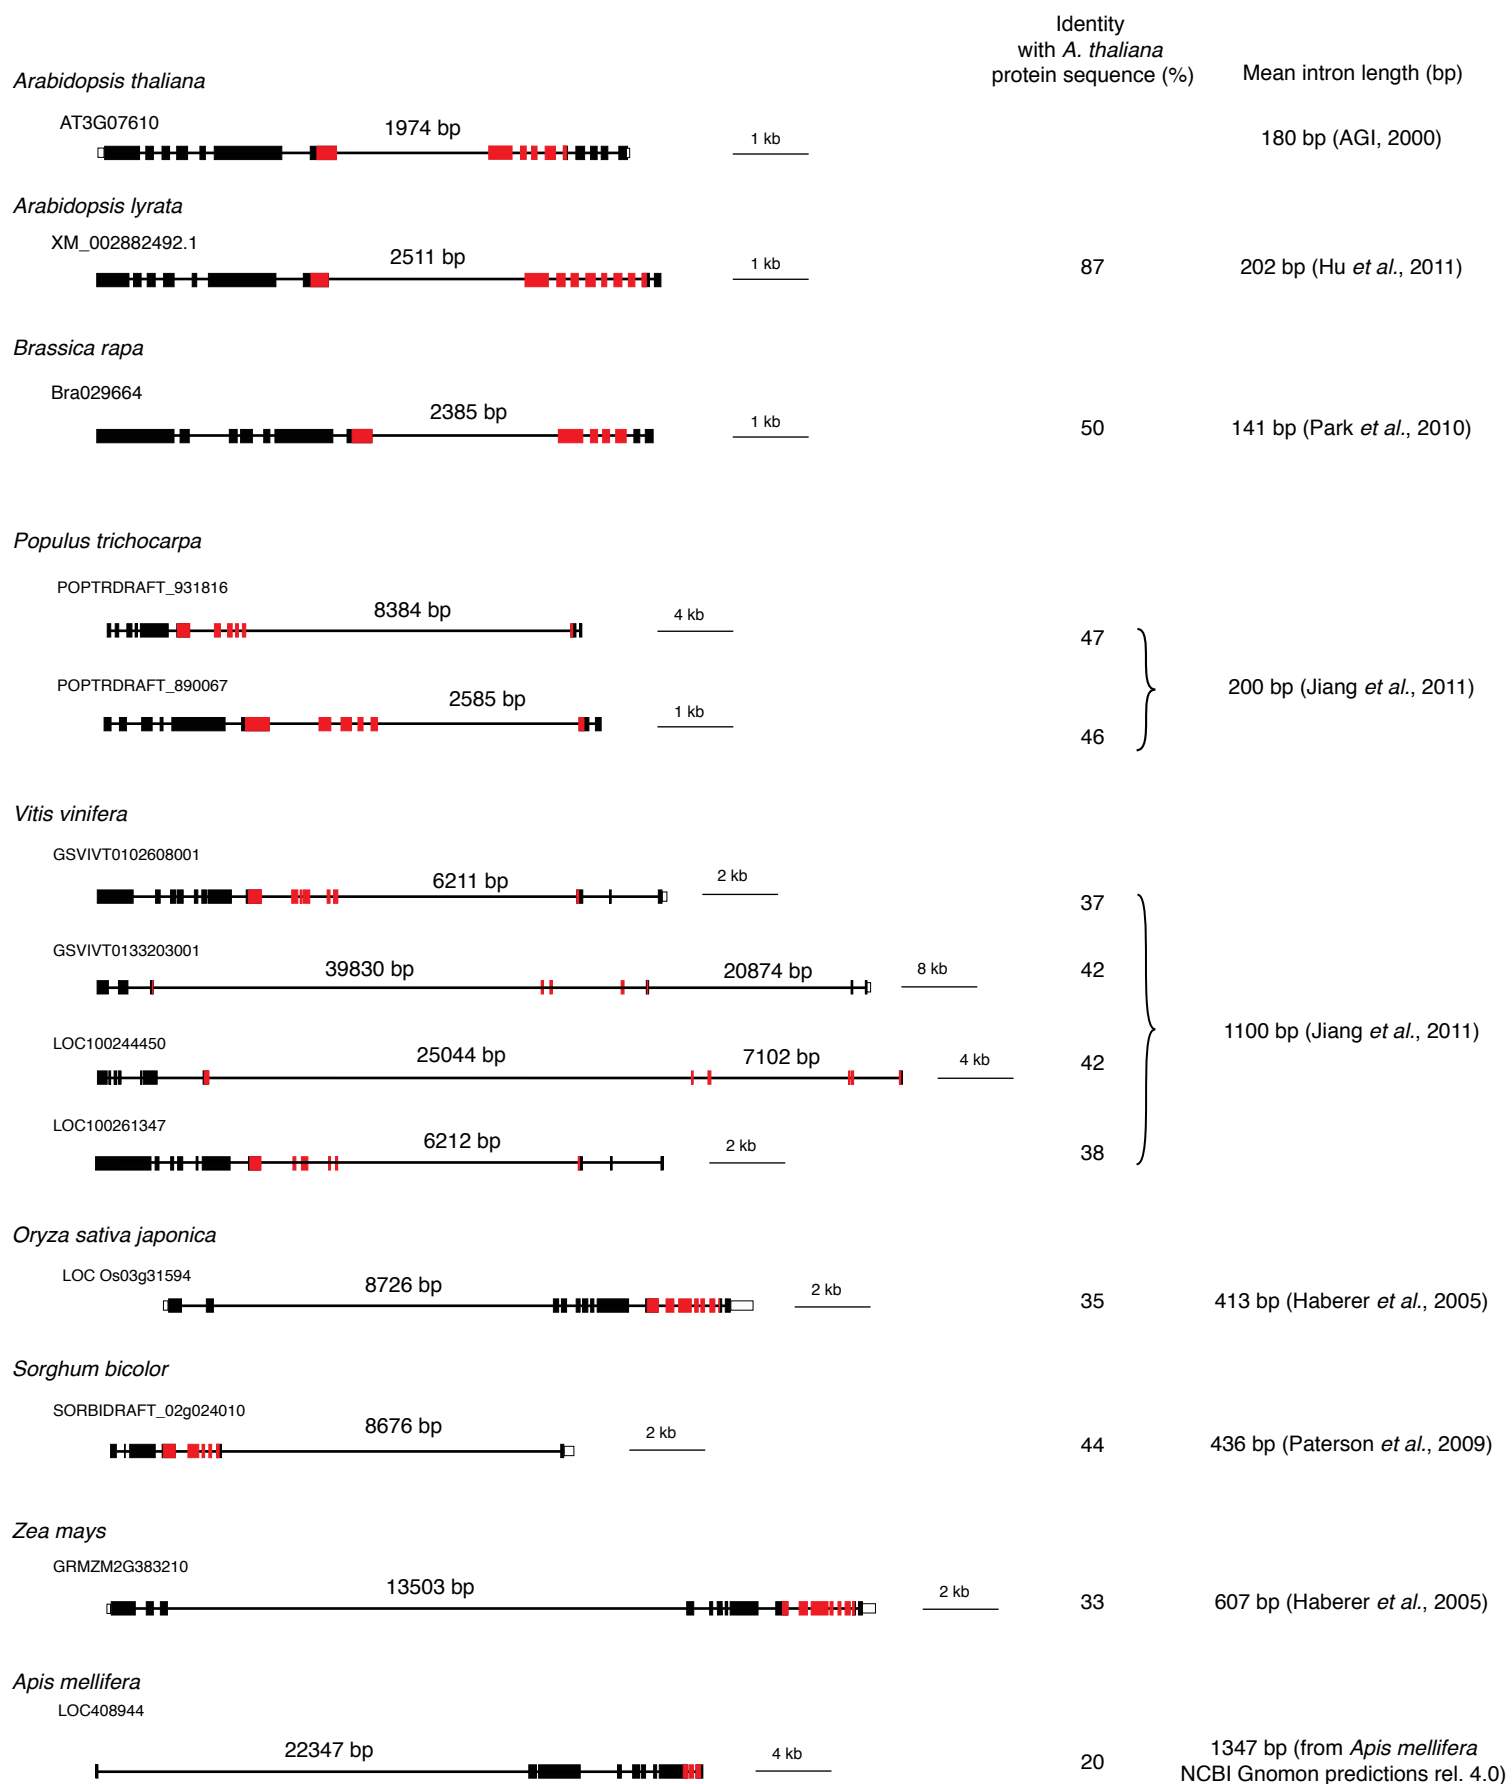

**Supplementary Figure S7.** Orthologs of the *A. thaliana* *IBM1* gene containing a large intron.

Boxes represent exons, with coding regions in black and untranslated regions in white. The region encoding the jmjC domain is shown in red (Saze *et al.*, 2008). Length of the large introns and scale bars are indicated for each gene. The mean length of introns in each organism and the percentage of identity of each orthologous protein with Arabidopsis *IBM1* protein are indicated.

Orthologous genes were identified by blastp of the Arabidopsis *IBM1* protein sequence against non-redundant protein sequences of the NCBI database (<http://blast.ncbi.nlm.nih.gov/Blast.cgi?PAGE=Proteins>). Additional genes annotated as orthologs of the *IBM1* gene in the Gramene database were selected (<http://www.gramene.org/>).

The percentage of identity of each orthologous protein with the Arabidopsis *IBM1* protein sequence were determined by alignment of orthologous protein sequences using the ClustalW2 program (<http://www.ebi.ac.uk/Tools/msa/clustalw2/>).

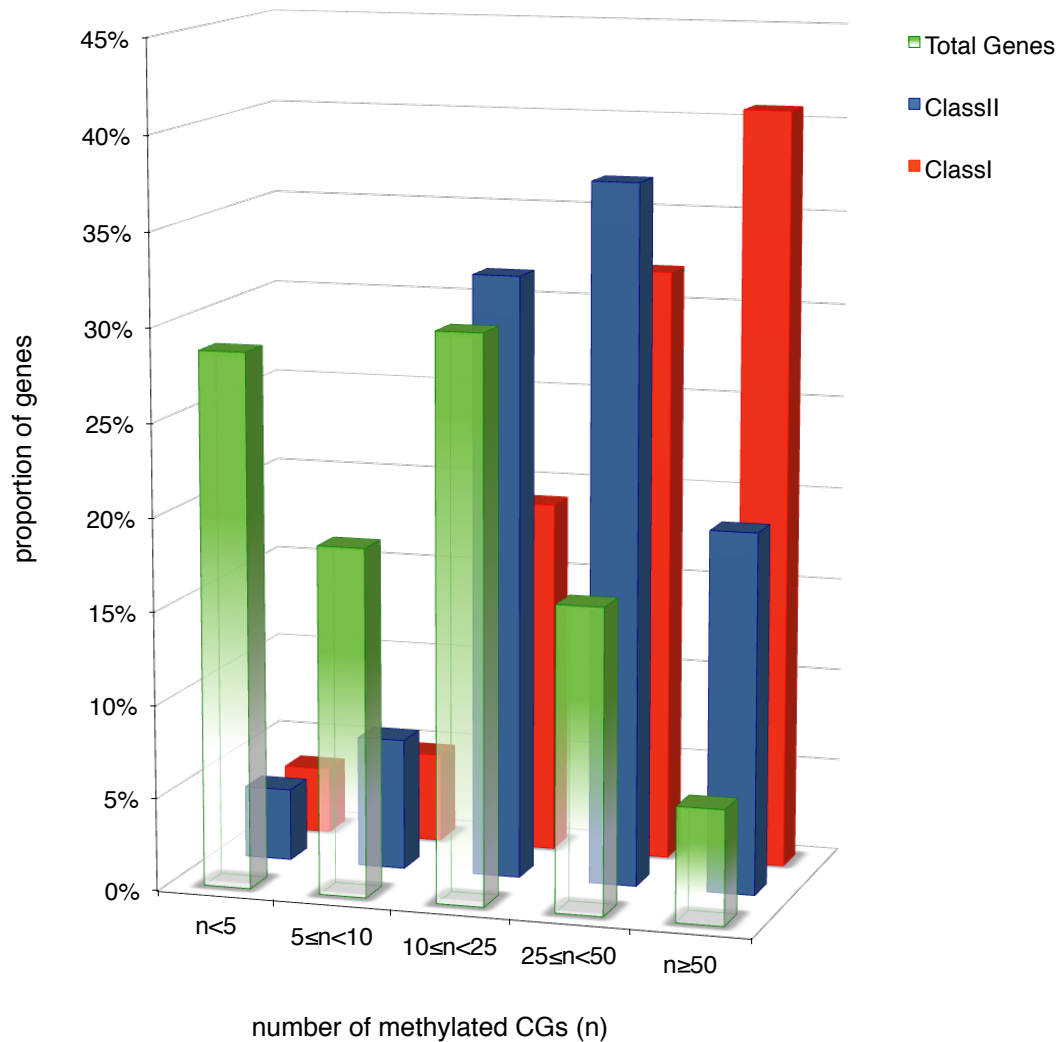

**Supplementary Figure S8.** Proportion of genes with the indicated number of methylated CG dinucleotides (n). Shown are Class I and Class II genes displaying DNA hypermethylation in the *ibm1-4* mutant (Miura et al, 2009) and total genes. The number of methylated CG dinucleotides was extracted from previously published datasets (Lister et al, 2008).



| <b>Locus</b>                | <b>Primer</b>                | <b>Sequence (5'-3')</b>           | <b>Methods</b>                                           |
|-----------------------------|------------------------------|-----------------------------------|----------------------------------------------------------|
| <b>18S rRNA</b>             | 18S-F2                       | TCCTATTGTGTTGGCTTCGG              | RT-PCR                                                   |
|                             | 18S-R                        | CACGTAGCTAGTTAGCAGGCTG            |                                                          |
| <b>ACT2<br/>(AT3G18780)</b> | ACT2-F <sup>1</sup>          | CTAAGCTCTCAAGATCAAAGGC            | RT-PCR                                                   |
|                             | ACT2-R <sup>1</sup>          | AACATTGCAAAGAGTTTCAAGG            |                                                          |
| <b>AT1G26400</b>            | At1g26400-RT-F1              | GATCTTAGCTTCATCCACGTTCAA          | RT-PCR, ChIP                                             |
|                             | At1g26400-RT-R1              | CGTCGACTCCAGGAGAATTT              |                                                          |
|                             | At1g26400-BS-F               | CTTAAACTACRCTTTTAACTACTAACTAAT    | Bisulfite sequencing                                     |
|                             | At1g26400-BS-R               | GGGGAATTTAAAGAGATTGATGGATGTTAAAG  |                                                          |
| <b>AT1G27000</b>            | At1g27000-F                  | TGTGAATTCTGCTGTTTTGTTG            | RT-PCR                                                   |
|                             | At1g27000-R                  | ACAACCACATCACGTTCCAA              |                                                          |
|                             | AT1G27000-BS-F               | CAAATTATRCAATRATTCCAAATCCATCTCAAA | Bisulfite sequencing, ChIP (with<br>AT1G27000-BS-Fbis/R) |
|                             | AT1G27000-BS-Fbis            | CATAACCACAACCACATCACRTTCCAAAAC    |                                                          |
|                             | AT1G27000-BS-R               | TGAAAAGAGATTTYAGTGTTGTAAGGGAAT    |                                                          |
| <b>AT1G58030</b>            | AT1G58030-F                  | ATTACAAAGGCCGTGGACA               | RT-PCR, ChIP                                             |
|                             | AT1G58030-R                  | TGTATCGGTGTGGCTGCTTA              |                                                          |
|                             | AT1G58030-BS-F               | CCCRITTRITCCCCTCCTACCTATCATCT     | Bisulfite sequencing                                     |
|                             | AT1G58030-BS-R               | GATTTGTGTTAYATATATAAYAAAAGAGATG   |                                                          |
|                             | AT1G58030-BS-Fbis            | CCTACCTATCATCTRCATTCTCATCAACAT    |                                                          |
| <b>AT2G12490</b>            | copia66_F                    | GTGCCCTGTACCCCTGGAT               | RT-PCR                                                   |
|                             | copia66_R                    | CTGATTGACTAGAACCGAAGAA            |                                                          |
|                             | AT2G12490-BS-F               | CAACACAACRATCAARCTTCAATTC         | Bisulfite sequencing                                     |
|                             | AT2G12490-BS-Fbis            | ATCRATCAARAACATAATCAAAACAAA       |                                                          |
| AT2G12490-BS-R              | TGAAGGTGATYAAAYGGAAGTAAGT    |                                   |                                                          |
| <b>AT2G19520</b>            | At2g19520-F                  | AAACAAGGGAACCTAGAAAGCAA           | RT-PCR                                                   |
|                             | At2g19520-R                  | TCTCTTAAACCACTGACACTATCTTG        |                                                          |
|                             | AT2G19520-BS-F               | TATRAARTATATCTCTTAAACCACT         | Bisulfite sequencing                                     |
|                             | AT2G19520-BS-Fbis            | CTCTTAAACCACTRACACTATCTTA         |                                                          |
|                             | AT2G19520-BS-R               | GGGAAAYTAGAAGYAAGTAAAATGAGAAAAGT  |                                                          |
| <b>AT2G24370</b>            | AT2G24370_F1                 | TGCGGATGTTTGTCTACGAGTTC           | RT-PCR, ChIP                                             |
|                             | AT2G24370_R1                 | CATTGGTGGTTTTGCTGTTATCA           |                                                          |
|                             | AT2G24370-F                  | ATTRTACAATTTTAAACACTTTCTCCACAA    | Bisulfite sequencing                                     |
|                             | AT2G24370-Fbis               | ACACTCTATTRCATCTCCTTATACTAC       |                                                          |
| AT2G24370-R                 | ACTAGAGAAAGGAACCTTGGTTGATTTA |                                   |                                                          |
| <b>AT2G42600</b>            | AT2G42600-F                  | AAAACCGAAGAGGTTGCAGA              | RT-PCR, ChIP                                             |
|                             | AT2G42600-R                  | ACCCGATCATGACTTCTTGC              |                                                          |
|                             | AT2G42600-BS-F               | CCTCRITCCAACRRITCCCACCTCTTCC      | Bisulfite sequencing                                     |
|                             | AT2G42600-BS-R               | GAATGGTYGGAGGATAAAAAGAYAGGAATGG   |                                                          |
| AT2G42600-BS-Fbis           | CTCCRTATCTTTTTTRCCACCTTCAC   |                                   |                                                          |
| <b>AT3G23750</b>            | AT3G23750-F                  | TGGATGTGTATGCATTGGTG              | RT-PCR, ChIP                                             |
|                             | AT3G23750-R                  | ATGTCGGGTCTTTGTTGAGG              |                                                          |
|                             | AT3G23750-BS-F               | TTCACATCRATTCCRAAACTCTCTTC        | Bisulfite sequencing                                     |
|                             | AT3G23750-BS-R               | ATTGGTTGYAYTGATATTGATGTATA        |                                                          |
|                             | AT3G23750-BS-Rbis            | GGAAGAGTAAYGAYGAAAGTGGATGTGTATG   |                                                          |
| <b>AT3G45446</b>            | AT3G45446-F                  | CCATTGTACTCCCAACACCA              | RT-PCR, ChIP                                             |
|                             | AT3G45446-R                  | TGAGAATTATGGCAACAAGGTG            |                                                          |
|                             | AT3G45446-BS-F               | TACTCCCAACACCATATCAATACCTT        | Bisulfite sequencing                                     |
|                             | AT3G45446-BS-R               | GTGGATYAGAAAGGTGAGAATTATGG        |                                                          |
|                             | AT3G45446-BS-Fbis            | CCATCCACATTAATTTTTCTCCCATC        |                                                          |
| <b>AT3G47860</b>            | AT3G47860-F                  | TCAGAAGAGTGTTTTGATTCTGGA          | RT-PCR, ChIP                                             |
|                             | AT3G47860-R                  | TTGGCACAATTTGGCTATGA              |                                                          |
|                             | AT3G47860-BS-F               | CTCTTRCACTRATCTTATATAAACCTAAT     | Bisulfite sequencing                                     |
|                             | AT3G47860-BS-R               | AYTTAAGATYYGATGTGGGATAAAAT        |                                                          |
|                             | AT3G47860-BS-Rbis            | GTAYTTTTGGTTTYTYTGTGGAGTGTATG     |                                                          |
| <b>AT4G24740</b>            | AT4G24740-F                  | TGGTCAAGTGCTAGAATGTTGG            | RT-PCR, ChIP                                             |
|                             | AT4G24740-R                  | ATGGTTACGATAGTCAAACCAGTTC         |                                                          |
|                             | AT4G24740-BS-F               | ACTACACACATRCTACACATCCAA          | Bisulfite sequencing                                     |
|                             | AT4G24740-BS-R               | GTTGGGATAGGGAGAGGAAGGAAATGGTGG    |                                                          |
|                             | AT4G24740-BS-Rbis            | GTGAGGYTGYTATGATTGAAATGAAATG      |                                                          |

|                                              |                                     |                                   |                                                       |
|----------------------------------------------|-------------------------------------|-----------------------------------|-------------------------------------------------------|
| <b>AT5G14060</b>                             | AT5G14060-F                         | GCAATGGAGTGAATGTGCAG              | RT-PCR                                                |
|                                              | AT5G14060-R                         | CAACAACAACAACAACAATGGA            |                                                       |
|                                              | AT5G14060-BS-F                      | TCTTRACACATTCTTARCAATAACTAC       | Bisulfite sequencing, ChIP (with AT5G14060-BS-F/Rbis) |
|                                              | AT5G14060-BS-R                      | TTTGATAGATTGTTTTYTTTTGTGAGGGT     |                                                       |
| AT5G14060-BS-Rbis                            | GGGTYATATGTGGTATTGGTTAAAGGG         |                                   |                                                       |
| <b>AT5G19097</b>                             | AT5G19097-F                         | CGAAGCCACAACATTTCCCTT             | RT-PCR, ChIP                                          |
|                                              | AT5G19097-R                         | CAGCCACTGCGTCTTTTACA              |                                                       |
|                                              | AT5G19097-BS-F                      | CTRAARCATCAATCCACAAATCATTCA       | Bisulfite sequencing                                  |
|                                              | AT5G19097-BS-R                      | GAAAGAATYTTTTAAAYTGAGAGATTTAGG    |                                                       |
| AT5G19097-BS-Fbis                            | CTTTCRAARCCACAACATTTCCCTT           |                                   |                                                       |
| <b>AT5G39960</b>                             | AT5G39960-F                         | GAGGGAAGAGGACGTATGGA              | RT-PCR, ChIP                                          |
|                                              | AT5G39960-R                         | TAGGAGTCCCAGCCTAAATCA             |                                                       |
|                                              | AT5G39960-BS-F                      | CTRTTTCRCCTTCCACCACCACCT          | Bisulfite sequencing                                  |
|                                              | AT5G39960-BS-R                      | GGAAGAGGAYGTATGGAAGTAATGAAAGAAG   |                                                       |
| AT5G39960-BS-Fbis                            | TCCRCCTAAATCAAAATCTTCCTTCAAT        |                                   |                                                       |
| <b>AtCOPIA4</b><br><b>(AT4G16870)</b>        | AtCOPIA4-F <sup>2</sup> (JP3067)    | CTTGTTGTCTTCCCCGTGT               | RT-PCR, ChIP                                          |
|                                              | AtCOPIA4-R <sup>2</sup> (JP3087)    | TGACGAAGAGCGTACCTGTG              |                                                       |
|                                              | AtCOPIA4-BS-R <sup>3</sup> (JP3100) | GGTTGTYTGTGTTTTTATGGTTYAGATTTATA  | Bisulfite sequencing                                  |
|                                              | AtCOPIA4-BS-F <sup>3</sup> (JP3101) | ATAACTRAACCACARATTCARCCCATTTTCATT |                                                       |
| <b>AtGP3-1</b><br><b>(AT3G11970)</b>         | AtGP3-1-F                           | AAGCATAATAGTACAAAAGTTCCCC         | RT-PCR                                                |
|                                              | AtGP3-1-R                           | TTCTCTTGGAAAGTTGCAGAC             |                                                       |
|                                              | AtGP3-1_BS-F <sup>4</sup>           | ATGYTAGTGTATYTTAAATAGTGTATYTTG    | Bisulfite sequencing, ChIP (with AtGP3-1_BS-Fbis/R)   |
|                                              | AtGP3-1_BS-R <sup>4</sup>           | AACRTTACTTTCTTTACCTTTTTATATAA     |                                                       |
| AtGP3-1_BS-Fbis                              | GGTTYAGGATAGATTATTAAYGGGGGAA        |                                   |                                                       |
| <b>AtMu1</b><br><b>(AT4G08680)</b>           | AtMu1-F <sup>5</sup>                | CCGAGAACTGGTTGTGGTTT              | RT-PCR                                                |
|                                              | AtMu1-R <sup>5</sup>                | GCTCTTGCTTTGGTGATGGT              |                                                       |
|                                              | AtMu1-BS-F1 <sup>6</sup>            | AATTTTATGGAATGAAGTATATG           | Bisulfite sequencing, ChIP (with AtMu1-BS-F1/Rbis)    |
|                                              | AtMu1-BS-R                          | AAATTTAARCCCTCTTCTCATACA          |                                                       |
| AtMu1-BS-Rbis <sup>6</sup>                   | TTCTCATACARTRRCTTCAATTT             |                                   |                                                       |
| <b>AtSN1</b><br><b>(AT3G44000-AT3G44005)</b> | ATS15 <sup>7</sup>                  | ACCAACGTGTTGTGGCCAGTGGTAAATC      | RT-PCR, ChIP                                          |
|                                              | ATS15-F4 <sup>7</sup>               | AAAATAAGTGGTGGTTGTACAAGC          |                                                       |
|                                              | AtSN1-BS-F                          | CTCTCAAAAACAAACCCCTTAAAC          | Bisulfite sequencing                                  |
|                                              | AtSN1-BS-R                          | GTTGAGATGGTGTTRTTGGAAAGG          |                                                       |
| AtSN1-BS-R1                                  | GGAAGTTTGTATAGTTTAAARATAAG          |                                   |                                                       |
| <b>BNS</b><br><b>(AT1G73177)</b>             | BNS-F2 <sup>8</sup>                 | GCTAGAGGTTTTAGTTCCTCTG            | <i>BNS</i> methylation analysis                       |
|                                              | BNS-R3 <sup>8</sup>                 | TTCCATTATGACATTTCAAGGTC           |                                                       |
| <b>CAC2</b><br><b>(AT1G35270-AT1G35280)</b>  | CAC2-RT-F                           | TTGGTCCGATAAGAGTTTCGT             | RT-PCR                                                |
|                                              | CAC2-RT-R                           | CGCAGGTTTCTTTCTTCAGC              |                                                       |
|                                              | CAC2-F                              | GCCTAAGTGTGGCGGACTA               | ChIP (with CAC2-bsR2)                                 |
|                                              | CAC2-bsF2 <sup>9</sup>              | CATATAAACCCCAAAATCAAATC           |                                                       |
| CAC2-bsR2 <sup>9</sup>                       | ATGGAAAAGGAGAAGGAGGTAT              | Bisulfite sequencing              |                                                       |
| CAC2-bsR2bis                                 | TYATTGATAGYAGTAGAGGATAG             |                                   |                                                       |
| <b>CMT3</b><br><b>(AT1G69770)</b>            | CMT3-MseI-F                         | ATGCCAAGGAATCAGTGGTC              | RT-PCR                                                |
|                                              | CMT3-MseI-R                         | AACTTTTGAATGGCGTTGTG              |                                                       |
|                                              | CMT3-R2                             | TAATCCGCAGTCCCACCT                | ChIP (with CMT3-BS-Fbis)                              |
|                                              | CMT3-BS-F                           | CCTAATTTTARTCAAAATTRCTAAAAACATC   |                                                       |
| CMT3-BS-Fbis                                 | TCAAAATTTTRCTAAAAACATCAATACTTA      | Bisulfite sequencing              |                                                       |
| CMT3-BS-R                                    | GGTGTATATGAAAYATTGTAGAATAITTTGAAG   |                                   |                                                       |
| <b>DME</b><br><b>(AT5G04560)</b>             | DME-F                               | TGAGAGGAAGTTTTCCGCTC              | RT-PCR                                                |
|                                              | DME-R                               | GTGTCGCTTCTGCTCTATGA              |                                                       |
| <b>EVD</b><br><b>(AT5G17125)</b>             | EVD_RT_F <sup>10</sup>              | GACCTGACATTTGTTTTGCG              | RT-PCR                                                |
|                                              | EVD_RT_R <sup>10</sup>              | GGTGAAGATATCCGCCAAC               |                                                       |
|                                              | EVD_TD                              | ACTCGTGAGTCCCTTCAACGG             | ChIP (with EVD-BS-R)                                  |
|                                              | EVD-BS-F <sup>10</sup>              | ACATRATCTTATRCTRATAACCAT          |                                                       |
| EVD-BS-R1 <sup>10</sup>                      | GTAGAGGAYAAATGTTAATTYGTTGTTGG       | Bisulfite sequencing              |                                                       |
| EVD-BS-R2 <sup>10</sup>                      | GTGYGAYAAGATYGATGTAGGTTATTG         |                                   |                                                       |

|                                     |                                    |                                          |                                                                            |                                                                        |
|-------------------------------------|------------------------------------|------------------------------------------|----------------------------------------------------------------------------|------------------------------------------------------------------------|
| <b>IBM1</b><br>( <i>AT3G07610</i> ) | IBM1-F8                            | ACAACAAGTCCAAAATGTTG                     | RT-PCR ( <i>IBM1-L</i> )                                                   |                                                                        |
|                                     | IBM1-R10                           | TAAACACTCGCTGACATTTTCAGG                 |                                                                            |                                                                        |
|                                     | IBM1-F9                            | TATGTAGTTGCCTTTGAAG                      | RT-PCR ( <i>IBM1-S</i> )                                                   |                                                                        |
|                                     | IBM1-R11                           | GTTCTGAAATCATTATAGATGTGC                 |                                                                            |                                                                        |
|                                     | IBM1-F10                           | TGAGATCCGCAATGGAAAAG                     | probe for Northern blot analysis                                           |                                                                        |
|                                     | IBM1-R12                           | CCAAACAATCAACAGCAAC                      |                                                                            |                                                                        |
|                                     | IBM1-F1                            | TCTGATGCGGTTAGTACCC                      | RT-PCR along the length of<br><i>IBM1</i> gene, ChIP (with IBM1-<br>F5/R6) |                                                                        |
|                                     | IBM1-R1                            | CCAAAAACCGAATGCCAGGCC                    |                                                                            |                                                                        |
|                                     | IBM1-R2                            | TAAGCAGAATGGATGAAGGC                     |                                                                            |                                                                        |
|                                     | IBM1-F2                            | AGCCTTCATCCATTCTGCTT                     |                                                                            |                                                                        |
|                                     | IBM1-R3                            | GCGTAATCTTTGCATTCAATGTG                  |                                                                            |                                                                        |
|                                     | IBM1-F3                            | CAGCATTTTATAAATGTTTGATTG                 |                                                                            |                                                                        |
|                                     | IBM1-F4                            | ACATTGAATGCAAAGATTACGC                   |                                                                            |                                                                        |
|                                     | IBM1-F5                            | TAAAGTGTGTTGTGATTGTTTCGA                 |                                                                            |                                                                        |
|                                     | IBM1-F6                            | ACTTCTTGATATTGTTCCGGAATG                 |                                                                            |                                                                        |
|                                     | IBM1-R4                            | CATTATTGATACGACAGACG                     |                                                                            |                                                                        |
|                                     | IBM1-R5                            | GCGAAATTGATGTTGGTCATT                    |                                                                            |                                                                        |
|                                     | IBM1-R6                            | ATCATTCCGAACAATATCAAGA                   |                                                                            |                                                                        |
|                                     | IBM1-R7                            | TGGAAAGAGTCATTGAGGTAG                    |                                                                            |                                                                        |
|                                     | IBM1-R8                            | CACAAAACCAAAATCTACTAAATTAECTATT          |                                                                            |                                                                        |
|                                     | IBM1_polyR1                        | TTAGTACTACTCTGTTAACTTAGAGGTA             |                                                                            | dCAPS analysis                                                         |
|                                     | IBM1-BS-F                          | GTTAATYGTYGATATAAYTGGTGTAGTT             |                                                                            | Bisulfite sequencing, methylation<br>analysis by restriction digestion |
|                                     | IBM1-BS-R                          | CACAAAACCAAAATCTACTAAATTAECTATT          |                                                                            |                                                                        |
|                                     | IBM1-BS-Fbis                       | TAGATTTTATATGTTGYTGTTA                   |                                                                            |                                                                        |
| <b>ROS1</b><br>( <i>AT2G36490</i> ) | ROS1-F                             | AGAAGAAATCCTACCATCA                      | RT-PCR                                                                     |                                                                        |
|                                     | ROS1-R                             | ACCGTCTTCGAGGTAATTC                      |                                                                            |                                                                        |
|                                     | ROS1-R2                            | AGAGGATGCTCGTCTGGAAG                     | ChIP (with ROS1-F)                                                         |                                                                        |
|                                     | ROS1_BS_F <sup>11</sup>            | TAGAGGAGGYGTTTTTTG                       | Bisulfite sequencing                                                       |                                                                        |
|                                     | ROS1_BS_Fbis <sup>11</sup>         | GAGGYGTTTTTTGAGGAT                       |                                                                            |                                                                        |
|                                     | ROS1_BS_R <sup>11</sup>            | CATTTTTAACCTAAAAACRAAAAAA                |                                                                            |                                                                        |
| <b>Ta3</b><br>( <i>AT1G37110</i> )  | Ta3-middle-F <sup>2</sup> (JP1565) | GATTCTTACTGTAAAGAATCGGCATTGAGAGA         | RT-PCR                                                                     |                                                                        |
|                                     | Ta3-middle-R <sup>2</sup> (JP1566) | TCCAAATTTCTGAGGTGCTTGTAACC               |                                                                            |                                                                        |
|                                     | Ta3-LTR-F <sup>2</sup> (JP1617)    | TAGGGTTCTTAGTTGATCTTGTATTGAGCTC          | ChIP                                                                       |                                                                        |
|                                     | Ta3-LTR-R <sup>2</sup> (JP1618)    | TTTGCTCTCAAACCTCTCAATTGAAGTTT            |                                                                            |                                                                        |
|                                     | Ta3-BS-F (JP1615) <sup>3</sup>     | GGTTTAATGTTGGTTTAGTGATATTYGGTTTAGT       | Bisulfite sequencing                                                       |                                                                        |
|                                     | Ta3-BS-Rbis (JP1616) <sup>3</sup>  | AATCAAAAAACRAATAAACCTCRCTCTRATACCACTTATT |                                                                            |                                                                        |
|                                     | Ta3-BS-R                           | CCATTAACACCTTTATCTCAACTCTA               |                                                                            |                                                                        |
| <b>TUB8</b><br>( <i>AT5G23860</i> ) | TUB8-F <sup>12</sup>               | ATAACCGTTTTCAAATTCTCTCTCTC               | ChIP                                                                       |                                                                        |
|                                     | TUB8-R <sup>12</sup>               | TGCAAATCGTTCTCTCCTTG                     |                                                                            |                                                                        |
| <b>UBQ1</b><br>( <i>AT3G52590</i> ) | UBQ-FWD (U1) <sup>13</sup>         | ACCGGCAAGACCATCACTCT                     | RT-PCR                                                                     |                                                                        |
|                                     | UBQ-Rev (U2) <sup>13</sup>         | AGGCCTCAACTGGTTGCTGT                     |                                                                            |                                                                        |

**Supplementary Table 1.** List of primers.

<sup>1</sup> Vaillant I, Schubert I, Tourmente S, Mathieu O (2006) MOM1 mediates DNA-methylation-independent silencing of repetitive sequences in Arabidopsis. *EMBO J* 7: 1273-1278

<sup>2</sup> Johnson L, Cao X and Jacobsen S (2002) Interplay between two epigenetic marks. DNA methylation and histone H3 lysine 9 methylation. *Curr Biol* 12: 1360-1367.

<sup>3</sup> Henderson IR, Zhang X, Lu C, Johnson L, Meyers BC, Green PJ, Jacobsen SE (2006) Dissecting Arabidopsis thaliana DICER function in small RNA processing, gene silencing and DNA methylation patterning. *Nat Genet* 38: 721-725

<sup>4</sup> Tsukahara S, Kobayashi A, Kawabe A, Mathieu O, Miura A, Kakutani T (2009) Bursts of retrotransposition reproduced in Arabidopsis. *Nature* 461: 423-426

<sup>5</sup> Singer T, Yordan C, Martienssen RA (2001) Robertson's Mutator transposons in *A. thaliana* are regulated by the chromatin-remodeling gene Decrease in DNA methylation (DDM1). *Genes Dev* 15: 591-602

- <sup>6</sup> Gruntman E, Qi Y, Slotkin RK, Roeder T, Martienssen RA, Sachidanandam R (2008) Kismeth: analyzer of plant methylation states through bisulfite sequencing. *BMC Bioinformatics* **9**: 371
- <sup>7</sup> Herr A J, Jensen MB, Dalmay T, Baulcombe DC (2005) RNA polymerase IV directs silencing of endogenous DNA. *Science* **308**: 118-120.
- <sup>8</sup> Saze H, Kakutani T (2007) Heritable epigenetic mutation of a transposon-flanked Arabidopsis gene due to lack of the chromatin-remodeling factor DDM1. *EMBO J* **26**: 3641-3652
- <sup>9</sup> Miura A, Nakamura M, Inagaki S, Kobayashi A, Saze H, Kakutani T (2009) An Arabidopsis jmjC domain protein protects transcribed genes from DNA methylation at CHG sites. *EMBO J* **28**: 1078-1086
- <sup>10</sup> Mirouze M, Reinders J, Bucher E, Nishimura T, Schneeberger K, Ossowski S, Cao J, Weigel D, Paszkowski J, Mathieu O (2009) Selective epigenetic control of retrotransposition in Arabidopsis. *Nature* **461**: 427-430
- <sup>11</sup> Reinders J, Delucinge Vivier C, Theiler G, Chollet D, Descombes P, Paszkowski J (2008) Genome-wide, high-resolution DNA methylation profiling using bisulfite-mediated cytosine conversion. *Genome Res* **18**: 469-476
- <sup>12</sup> Mathieu O, Probst A, Paszkowski J (2005) Distinct regulation of histone H3 methylation at lysines 27 and 9 by CpG methylation in Arabidopsis. *EMBO J* **24**: 2783-2791
- <sup>13</sup> Zhang W, Sun Y, Timofejeva L, Chen C, Grossniklaus U, Ma H (2006) Regulation of Arabidopsis tapetum development and function by DYSFUNCTIONAL TAPETUM1 (DYT1) encoding a putative bHLH transcription factor. *Development* **133**: 3085-3095
